# Supplementary material for: Inhibition of Retinal Ganglion Cell Loss By a Novel ROCK Inhibitor (E212) in Ischemic Optic Nerve Injury Via Antioxidative and Anti-Inflammatory Actions
Source: PubMed Central journal article supplement — Invest Ophthalmol Vis Sci. 2021 May 20;62(6):21. doi: 10.1167/iovs.62.6.21 (PMC8142697; doi:10.1167/iovs.62.6.21), 2021-05-20
Supplement: iovs-62-6-21_s002.pdf [file iovs-62-6-21_s002.pdf]

Table 3 - TREEspot™ Interaction Maps for TAQ007-01-p-00001

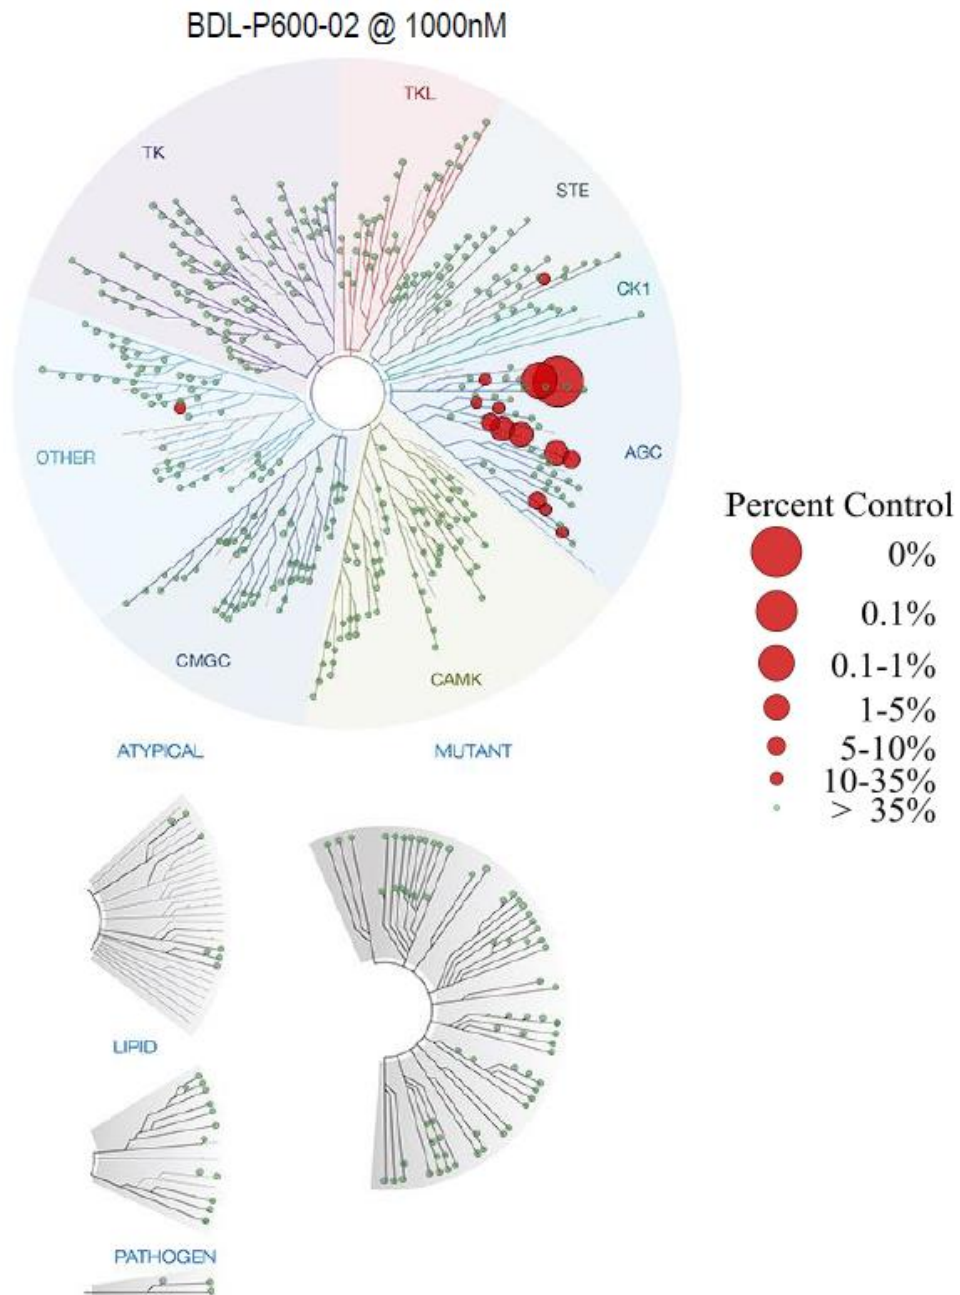

| Compound Name | KINOMEScan Gene Symbol | Percent Control % | Compound Concentration (nM) |
|---------------|------------------------|-------------------|-----------------------------|
| ITRI-E-212    | ROCK1                  | 0.05              | 1000                        |
| ITRI-E-212    | ROCK2                  | 0.35              | 1000                        |
| ITRI-E-212    | PRKX                   | 2.3               | 1000                        |
| ITRI-E-212    | PRKG2                  | 2.9               | 1000                        |
| ITRI-E-212    | PKAC-alpha             | 4.9               | 1000                        |
| ITRI-E-212    | PRKG1                  | 5.5               | 1000                        |
| ITRI-E-212    | PKN1                   | 7.8               | 1000                        |
| ITRI-E-212    | PKAC-beta              | 8.2               | 1000                        |
| ITRI-E-212    | YSK4                   | 12                | 1000                        |
| ITRI-E-212    | LATS2                  | 13                | 1000                        |
| ITRI-E-212    | GRK3                   | 15                | 1000                        |
| ITRI-E-212    | GRK2                   | 24                | 1000                        |
| ITRI-E-212    | HASPIN                 | 27                | 1000                        |
| ITRI-E-212    | PRKCH                  | 27                | 1000                        |
| ITRI-E-212    | PKN2                   | 30                | 1000                        |
| ITRI-E-212    | AKT1                   | 36                | 1000                        |
| ITRI-E-212    | PIK4CB                 | 36                | 1000                        |
| ITRI-E-212    | ICK                    | 37                | 1000                        |
| ITRI-E-212    | STK33                  | 39                | 1000                        |
| ITRI-E-212    | VPS34                  | 41                | 1000                        |
| ITRI-E-212    | MYLK4                  | 43                | 1000                        |
| ITRI-E-212    | PRKCD                  | 43                | 1000                        |
| ITRI-E-212    | DAPK3                  | 43                | 1000                        |
| ITRI-E-212    | HIPK4                  | 47                | 1000                        |
| ITRI-E-212    | MAST1                  | 49                | 1000                        |
| ITRI-E-212    | RIPK4                  | 50                | 1000                        |
| ITRI-E-212    | AKT3                   | 52                | 1000                        |
| ITRI-E-212    | LRRK2                  | 53                | 1000                        |
| ITRI-E-212    | PAK3                   | 54                | 1000                        |
| ITRI-E-212    | PAK4                   | 54                | 1000                        |
| ITRI-E-212    | CSNK2A1                | 54                | 1000                        |
| ITRI-E-212    | ALK                    | 56                | 1000                        |
| ITRI-E-212    | BTK                    | 57                | 1000                        |
| ITRI-E-212    | KIT(A829P)             | 57                | 1000                        |
| ITRI-E-212    | PRKD1                  | 59                | 1000                        |
| ITRI-E-212    | MKNK2                  | 60                | 1000                        |

|            |                                   |    |      |
|------------|-----------------------------------|----|------|
| ITRI-E-212 | DAPK1                             | 60 | 1000 |
| ITRI-E-212 | SGK3                              | 60 | 1000 |
| ITRI-E-212 | KIT(D816H)                        | 60 | 1000 |
| ITRI-E-212 | MEK3                              | 61 | 1000 |
| ITRI-E-212 | PRKD3                             | 61 | 1000 |
| ITRI-E-212 | MEK5                              | 61 | 1000 |
| ITRI-E-212 | AURKB                             | 61 | 1000 |
| ITRI-E-212 | MELK                              | 62 | 1000 |
| ITRI-E-212 | ABL1(F317I)-<br>nonphosphorylated | 62 | 1000 |
| ITRI-E-212 | ABL1(H396P)-<br>phosphorylated    | 63 | 1000 |
| ITRI-E-212 | DYRK2                             | 64 | 1000 |
| ITRI-E-212 | NIM1                              | 64 | 1000 |
| ITRI-E-212 | FLT3(ITD,F691L)                   | 64 | 1000 |
| ITRI-E-212 | PDGFRA                            | 65 | 1000 |
| ITRI-E-212 | MERTK                             | 65 | 1000 |
| ITRI-E-212 | PIK3CA(Q546K)                     | 65 | 1000 |
| ITRI-E-212 | IKK-beta                          | 67 | 1000 |
| ITRI-E-212 | PAK7                              | 67 | 1000 |
| ITRI-E-212 | MAP3K15                           | 67 | 1000 |
| ITRI-E-212 | KIT(D816V)                        | 67 | 1000 |
| ITRI-E-212 | ABL1(Q252H)-<br>phosphorylated    | 68 | 1000 |
| ITRI-E-212 | DCAMKL3                           | 68 | 1000 |
| ITRI-E-212 | RIOK2                             | 69 | 1000 |
| ITRI-E-212 | RSK2(Kin.Dom.2-C-<br>terminal)    | 69 | 1000 |
| ITRI-E-212 | MEK1                              | 69 | 1000 |
| ITRI-E-212 | CTK                               | 69 | 1000 |
| ITRI-E-212 | RSK3(Kin.Dom.2-C-<br>terminal)    | 69 | 1000 |
| ITRI-E-212 | CHEK2                             | 69 | 1000 |
| ITRI-E-212 | S6K1                              | 70 | 1000 |
| ITRI-E-212 | TRKA                              | 70 | 1000 |
| ITRI-E-212 | RSK4(Kin.Dom.1-N-<br>terminal)    | 70 | 1000 |
| ITRI-E-212 | MYLK                              | 70 | 1000 |

|            |                                   |    |      |
|------------|-----------------------------------|----|------|
| ITRI-E-212 | HIPK1                             | 70 | 1000 |
| ITRI-E-212 | CAMK1B                            | 70 | 1000 |
| ITRI-E-212 | JNK3                              | 70 | 1000 |
| ITRI-E-212 | AURKA                             | 70 | 1000 |
| ITRI-E-212 | GRK7                              | 71 | 1000 |
| ITRI-E-212 | TRKB                              | 71 | 1000 |
| ITRI-E-212 | PIK3CA(M1043I)                    | 71 | 1000 |
| ITRI-E-212 | PAK2                              | 71 | 1000 |
| ITRI-E-212 | PRKCE                             | 72 | 1000 |
| ITRI-E-212 | NDR1                              | 72 | 1000 |
| ITRI-E-212 | SGK2                              | 72 | 1000 |
| ITRI-E-212 | FLT3(D835V)                       | 72 | 1000 |
| ITRI-E-212 | MARK1                             | 72 | 1000 |
| ITRI-E-212 | JNK1                              | 72 | 1000 |
| ITRI-E-212 | STK39                             | 72 | 1000 |
| ITRI-E-212 | CHEK1                             | 72 | 1000 |
| ITRI-E-212 | INSR                              | 72 | 1000 |
| ITRI-E-212 | PIK3C2G                           | 72 | 1000 |
| ITRI-E-212 | JAK3(JH1domain-<br>catalytic)     | 73 | 1000 |
| ITRI-E-212 | LKB1                              | 73 | 1000 |
| ITRI-E-212 | PFCDPK1(P.falciparum)             | 73 | 1000 |
| ITRI-E-212 | TBK1                              | 73 | 1000 |
| ITRI-E-212 | PIK3CA(E542K)                     | 73 | 1000 |
| ITRI-E-212 | EGFR(L747-<br>T751del,Sins)       | 73 | 1000 |
| ITRI-E-212 | SRC                               | 73 | 1000 |
| ITRI-E-212 | PIK3CG                            | 73 | 1000 |
| ITRI-E-212 | ABL1(F317L)-<br>nonphosphorylated | 74 | 1000 |
| ITRI-E-212 | LZK                               | 74 | 1000 |
| ITRI-E-212 | MAP3K2                            | 74 | 1000 |
| ITRI-E-212 | RPS6KA4(Kin.Dom.2-C-<br>terminal) | 74 | 1000 |
| ITRI-E-212 | GRK1                              | 74 | 1000 |
| ITRI-E-212 | EGFR(T790M)                       | 74 | 1000 |
| ITRI-E-212 | PIK3C2B                           | 74 | 1000 |
| ITRI-E-212 | PIM1                              | 74 | 1000 |

|            |                                |    |      |
|------------|--------------------------------|----|------|
| ITRI-E-212 | BRSK2                          | 74 | 1000 |
| ITRI-E-212 | MLCK                           | 74 | 1000 |
| ITRI-E-212 | MAP3K1                         | 75 | 1000 |
| ITRI-E-212 | NDR2                           | 75 | 1000 |
| ITRI-E-212 | BMPR1B                         | 75 | 1000 |
| ITRI-E-212 | MEK2                           | 75 | 1000 |
| ITRI-E-212 | ABL1(F317L)-<br>phosphorylated | 75 | 1000 |
| ITRI-E-212 | PIK3CB                         | 75 | 1000 |
| ITRI-E-212 | PIK3CA(I800L)                  | 76 | 1000 |
| ITRI-E-212 | SRPK3                          | 76 | 1000 |
| ITRI-E-212 | PKNB(M.tuberculosis)           | 76 | 1000 |
| ITRI-E-212 | BRSK1                          | 76 | 1000 |
| ITRI-E-212 | SGK                            | 77 | 1000 |
| ITRI-E-212 | ABL1(M351T)-<br>phosphorylated | 77 | 1000 |
| ITRI-E-212 | PLK4                           | 77 | 1000 |
| ITRI-E-212 | AXL                            | 77 | 1000 |
| ITRI-E-212 | FGFR2                          | 77 | 1000 |
| ITRI-E-212 | PIK3CA(E545A)                  | 77 | 1000 |
| ITRI-E-212 | PLK1                           | 78 | 1000 |
| ITRI-E-212 | WNK2                           | 78 | 1000 |
| ITRI-E-212 | IKK-epsilon                    | 78 | 1000 |
| ITRI-E-212 | FLT3(ITD,D835V)                | 78 | 1000 |
| ITRI-E-212 | PAK1                           | 78 | 1000 |
| ITRI-E-212 | PLK3                           | 78 | 1000 |
| ITRI-E-212 | LATS1                          | 79 | 1000 |
| ITRI-E-212 | MKNK1                          | 79 | 1000 |
| ITRI-E-212 | ABL1(E255K)-<br>phosphorylated | 79 | 1000 |
| ITRI-E-212 | PAK6                           | 79 | 1000 |
| ITRI-E-212 | TSSK1B                         | 79 | 1000 |
| ITRI-E-212 | EGFR(E746-A750del)             | 79 | 1000 |
| ITRI-E-212 | MEK4                           | 79 | 1000 |
| ITRI-E-212 | CAMK2A                         | 79 | 1000 |
| ITRI-E-212 | PIK3CA(H1047Y)                 | 79 | 1000 |
| ITRI-E-212 | ZAK                            | 79 | 1000 |
| ITRI-E-212 | PRKCQ                          | 80 | 1000 |

|            |                                   |    |      |
|------------|-----------------------------------|----|------|
| ITRI-E-212 | HIPK3                             | 80 | 1000 |
| ITRI-E-212 | TAK1                              | 80 | 1000 |
| ITRI-E-212 | JAK1(JH1domain-<br>catalytic)     | 80 | 1000 |
| ITRI-E-212 | EPHB6                             | 80 | 1000 |
| ITRI-E-212 | PRKR                              | 80 | 1000 |
| ITRI-E-212 | ULK2                              | 80 | 1000 |
| ITRI-E-212 | ALK(C1156Y)                       | 80 | 1000 |
| ITRI-E-212 | NEK10                             | 80 | 1000 |
| ITRI-E-212 | FGFR3                             | 80 | 1000 |
| ITRI-E-212 | CIT                               | 81 | 1000 |
| ITRI-E-212 | SNARK                             | 81 | 1000 |
| ITRI-E-212 | HIPK2                             | 81 | 1000 |
| ITRI-E-212 | CDK4-cyclinD1                     | 81 | 1000 |
| ITRI-E-212 | ABL1(Y253F)-<br>phosphorylated    | 81 | 1000 |
| ITRI-E-212 | RPS6KA5(Kin.Dom.2-C-<br>terminal) | 81 | 1000 |
| ITRI-E-212 | DAPK2                             | 81 | 1000 |
| ITRI-E-212 | RIOK3                             | 81 | 1000 |
| ITRI-E-212 | DDR2                              | 81 | 1000 |
| ITRI-E-212 | CSNK2A2                           | 81 | 1000 |
| ITRI-E-212 | BMPR2                             | 81 | 1000 |
| ITRI-E-212 | PIM3                              | 81 | 1000 |
| ITRI-E-212 | PCTK1                             | 81 | 1000 |
| ITRI-E-212 | CDK11                             | 81 | 1000 |
| ITRI-E-212 | IRAK3                             | 81 | 1000 |
| ITRI-E-212 | MINK                              | 82 | 1000 |
| ITRI-E-212 | JNK2                              | 82 | 1000 |
| ITRI-E-212 | PHKG2                             | 82 | 1000 |
| ITRI-E-212 | AAK1                              | 83 | 1000 |
| ITRI-E-212 | TRKC                              | 83 | 1000 |
| ITRI-E-212 | CDK7                              | 83 | 1000 |
| ITRI-E-212 | RSK2(Kin.Dom.1-N-<br>terminal)    | 83 | 1000 |
| ITRI-E-212 | KIT-autoinhibited                 | 83 | 1000 |
| ITRI-E-212 | ADCK3                             | 83 | 1000 |
| ITRI-E-212 | PIK3CA                            | 83 | 1000 |

|            |                               |    |      |
|------------|-------------------------------|----|------|
| ITRI-E-212 | NEK3                          | 83 | 1000 |
| ITRI-E-212 | ERBB3                         | 83 | 1000 |
| ITRI-E-212 | ULK3                          | 83 | 1000 |
| ITRI-E-212 | PHKG1                         | 83 | 1000 |
| ITRI-E-212 | SRPK1                         | 84 | 1000 |
| ITRI-E-212 | CSNK1G2                       | 84 | 1000 |
| ITRI-E-212 | FLT3(D835Y)                   | 84 | 1000 |
| ITRI-E-212 | RET(M918T)                    | 84 | 1000 |
| ITRI-E-212 | RPS6KA5(Kin.Dom.1-N-terminal) | 84 | 1000 |
| ITRI-E-212 | SgK110                        | 84 | 1000 |
| ITRI-E-212 | PIK3CA(H1047L)                | 84 | 1000 |
| ITRI-E-212 | FGFR3(G697C)                  | 84 | 1000 |
| ITRI-E-212 | EPHA1                         | 84 | 1000 |
| ITRI-E-212 | TTK                           | 84 | 1000 |
| ITRI-E-212 | VRK2                          | 85 | 1000 |
| ITRI-E-212 | GRK4                          | 85 | 1000 |
| ITRI-E-212 | MAPKAPK5                      | 85 | 1000 |
| ITRI-E-212 | PIK3CD                        | 85 | 1000 |
| ITRI-E-212 | EGFR(L861Q)                   | 85 | 1000 |
| ITRI-E-212 | TSSK3                         | 85 | 1000 |
| ITRI-E-212 | MAP3K3                        | 85 | 1000 |
| ITRI-E-212 | MYO3B                         | 85 | 1000 |
| ITRI-E-212 | BMX                           | 85 | 1000 |
| ITRI-E-212 | CDKL3                         | 85 | 1000 |
| ITRI-E-212 | ALK(L1196M)                   | 85 | 1000 |
| ITRI-E-212 | PIK3CA(C420R)                 | 85 | 1000 |
| ITRI-E-212 | DYRK1A                        | 86 | 1000 |
| ITRI-E-212 | ABL1(F317I)-phosphorylated    | 86 | 1000 |
| ITRI-E-212 | TYK2(JH2domain-pseudokinase)  | 86 | 1000 |
| ITRI-E-212 | CAMK1D                        | 86 | 1000 |
| ITRI-E-212 | AMPK-alpha2                   | 86 | 1000 |
| ITRI-E-212 | EGFR(L747-E749del, A750P)     | 86 | 1000 |
| ITRI-E-212 | PIK3CA(E545K)                 | 86 | 1000 |
| ITRI-E-212 | RSK3(Kin.Dom.1-N-             | 86 | 1000 |

|            |                               |    |      |
|------------|-------------------------------|----|------|
|            | terminal)                     |    |      |
| ITRI-E-212 | RSK4(Kin.Dom.2-C-terminal)    | 86 | 1000 |
| ITRI-E-212 | TNNI3K                        | 86 | 1000 |
| ITRI-E-212 | PFPK5(P.falciparum)           | 87 | 1000 |
| ITRI-E-212 | PLK2                          | 87 | 1000 |
| ITRI-E-212 | DRAK1                         | 87 | 1000 |
| ITRI-E-212 | NEK4                          | 87 | 1000 |
| ITRI-E-212 | PRKCI                         | 87 | 1000 |
| ITRI-E-212 | RIPK2                         | 87 | 1000 |
| ITRI-E-212 | CAMKK2                        | 87 | 1000 |
| ITRI-E-212 | TYRO3                         | 87 | 1000 |
| ITRI-E-212 | EGFR(L747-S752del, P753S)     | 87 | 1000 |
| ITRI-E-212 | MAP4K4                        | 87 | 1000 |
| ITRI-E-212 | RET                           | 87 | 1000 |
| ITRI-E-212 | YES                           | 87 | 1000 |
| ITRI-E-212 | WNK4                          | 88 | 1000 |
| ITRI-E-212 | JAK1(JH2domain-pseudokinase)  | 88 | 1000 |
| ITRI-E-212 | CDK4 88                       | 88 | 1000 |
| ITRI-E-212 | NEK11                         | 88 | 1000 |
| ITRI-E-212 | ABL1(H396P)-nonphosphorylated | 88 | 1000 |
| ITRI-E-212 | ZAP70                         | 88 | 1000 |
| ITRI-E-212 | LCK                           | 88 | 1000 |
| ITRI-E-212 | EIF2AK1                       | 88 | 1000 |
| ITRI-E-212 | RAF1                          | 88 | 1000 |
| ITRI-E-212 | MARK4                         | 88 | 1000 |
| ITRI-E-212 | RIPK5                         | 88 | 1000 |
| ITRI-E-212 | EPHA2                         | 88 | 1000 |
| ITRI-E-212 | MEK6                          | 88 | 1000 |
| ITRI-E-212 | JAK2(JH1domain-catalytic)     | 89 | 1000 |
| ITRI-E-212 | TYK2(JH1domain-catalytic)     | 89 | 1000 |
| ITRI-E-212 | FLT3(D835H)                   | 89 | 1000 |
| ITRI-E-212 | CSF1R-autoinhibited           | 89 | 1000 |



|            |                                |    |      |
|------------|--------------------------------|----|------|
| ITRI-E-212 | AMPK-alpha1                    | 89 | 1000 |
| ITRI-E-212 | ABL1(T315I)-<br>phosphorylated | 89 | 1000 |
| ITRI-E-212 | p38-gamma                      | 89 | 1000 |
| ITRI-E-212 | ERN1                           | 89 | 1000 |
| ITRI-E-212 | MAK                            | 89 | 1000 |
| ITRI-E-212 | MYO3A                          | 89 | 1000 |
| ITRI-E-212 | p38-alpha                      | 89 | 1000 |
| ITRI-E-212 | ANKK1                          | 90 | 1000 |
| ITRI-E-212 | FLT3(R834Q)                    | 90 | 1000 |
| ITRI-E-212 | GAK                            | 90 | 1000 |
| ITRI-E-212 | CLK3                           | 90 | 1000 |
| ITRI-E-212 | YANK1                          | 90 | 1000 |
| ITRI-E-212 | MLK3                           | 90 | 1000 |
| ITRI-E-212 | PKMYT1                         | 90 | 1000 |
| ITRI-E-212 | NIK                            | 90 | 1000 |
| ITRI-E-212 | RSK1(Kin.Dom.1-N-<br>terminal) | 90 | 1000 |
| ITRI-E-212 | TGFBR1                         | 90 | 1000 |
| ITRI-E-212 | CDK5                           | 90 | 1000 |
| ITRI-E-212 | FLT4                           | 90 | 1000 |
| ITRI-E-212 | NEK2                           | 90 | 1000 |
| ITRI-E-212 | BRAF(V600E)                    | 91 | 1000 |
| ITRI-E-212 | EPHA3                          | 91 | 1000 |
| ITRI-E-212 | RET(V804L)                     | 91 | 1000 |
| ITRI-E-212 | SLK                            | 91 | 1000 |
| ITRI-E-212 | CAMK1                          | 91 | 1000 |
| ITRI-E-212 | FGFR1                          | 91 | 1000 |
| ITRI-E-212 | SIK                            | 91 | 1000 |
| ITRI-E-212 | PRKD2                          | 91 | 1000 |
| ITRI-E-212 | EGFR(L858R,T790M)              | 91 | 1000 |
| ITRI-E-212 | PIM2                           | 91 | 1000 |
| ITRI-E-212 | CDK9                           | 91 | 1000 |
| ITRI-E-212 | ERK5                           | 91 | 1000 |
| ITRI-E-212 | BUB1                           | 92 | 1000 |
| ITRI-E-212 | RIOK1                          | 92 | 1000 |
| ITRI-E-212 | CAMK2G                         | 92 | 1000 |
| ITRI-E-212 | IKK-alpha                      | 92 | 1000 |

|            |             |    |      |
|------------|-------------|----|------|
| ITRI-E-212 | RET(V804M)  | 92 | 1000 |
| ITRI-E-212 | SBK1        | 92 | 1000 |
| ITRI-E-212 | CAMK2D      | 92 | 1000 |
| ITRI-E-212 | CSK         | 92 | 1000 |
| ITRI-E-212 | DRAK2       | 92 | 1000 |
| ITRI-E-212 | LIMK1       | 92 | 1000 |
| ITRI-E-212 | YANK2       | 92 | 1000 |
| ITRI-E-212 | PCK2        | 92 | 1000 |
| ITRI-E-212 | STK16       | 92 | 1000 |
| ITRI-E-212 | CAMK4       | 92 | 1000 |
| ITRI-E-212 | CDC2L1      | 92 | 1000 |
| ITRI-E-212 | MST2        | 92 | 1000 |
| ITRI-E-212 | MST3        | 92 | 1000 |
| ITRI-E-212 | CLK4        | 93 | 1000 |
| ITRI-E-212 | DLK         | 93 | 1000 |
| ITRI-E-212 | BRAF        | 93 | 1000 |
| ITRI-E-212 | DMPK2       | 93 | 1000 |
| ITRI-E-212 | EGFR        | 93 | 1000 |
| ITRI-E-212 | LIMK2       | 93 | 1000 |
| ITRI-E-212 | PIKFYVE     | 93 | 1000 |
| ITRI-E-212 | ROS1        | 93 | 1000 |
| ITRI-E-212 | TLK2        | 93 | 1000 |
| ITRI-E-212 | MLK1        | 93 | 1000 |
| ITRI-E-212 | STK36       | 93 | 1000 |
| ITRI-E-212 | NEK1        | 93 | 1000 |
| ITRI-E-212 | NEK7        | 93 | 1000 |
| ITRI-E-212 | RIPK1       | 93 | 1000 |
| ITRI-E-212 | TESK1       | 93 | 1000 |
| ITRI-E-212 | IRAK1       | 94 | 1000 |
| ITRI-E-212 | MKK7        | 94 | 1000 |
| ITRI-E-212 | IRAK4       | 94 | 1000 |
| ITRI-E-212 | ABL2        | 94 | 1000 |
| ITRI-E-212 | EPHB1       | 94 | 1000 |
| ITRI-E-212 | AKT2        | 94 | 1000 |
| ITRI-E-212 | FLT3(N841I) | 94 | 1000 |
| ITRI-E-212 | NEK5        | 94 | 1000 |
| ITRI-E-212 | PFTK1       | 94 | 1000 |
| ITRI-E-212 | TLK1        | 94 | 1000 |

|            |                                   |    |      |
|------------|-----------------------------------|----|------|
| ITRI-E-212 | TXK                               | 94 | 1000 |
| ITRI-E-212 | CLK2                              | 95 | 1000 |
| ITRI-E-212 | CLK1                              | 95 | 1000 |
| ITRI-E-212 | CSNK1A1                           | 95 | 1000 |
| ITRI-E-212 | EGFR(G719S)                       | 95 | 1000 |
| ITRI-E-212 | FLT3(K663Q)                       | 95 | 1000 |
| ITRI-E-212 | FLT3(ITD)                         | 95 | 1000 |
| ITRI-E-212 | LYN                               | 95 | 1000 |
| ITRI-E-212 | SYK                               | 95 | 1000 |
| ITRI-E-212 | TAOK2                             | 95 | 1000 |
| ITRI-E-212 | ACVR1                             | 95 | 1000 |
| ITRI-E-212 | p38-beta                          | 95 | 1000 |
| ITRI-E-212 | PDPK1                             | 95 | 1000 |
| ITRI-E-212 | ABL1(T315I)-<br>nonphosphorylated | 96 | 1000 |
| ITRI-E-212 | GSK3B                             | 96 | 1000 |
| ITRI-E-212 | FGFR4                             | 96 | 1000 |
| ITRI-E-212 | MET(Y1235D)                       | 96 | 1000 |
| ITRI-E-212 | EGFR(L858R)                       | 96 | 1000 |
| ITRI-E-212 | CDC2L2                            | 96 | 1000 |
| ITRI-E-212 | ULK1                              | 96 | 1000 |
| ITRI-E-212 | HUNK                              | 96 | 1000 |
| ITRI-E-212 | CSNK1G1                           | 96 | 1000 |
| ITRI-E-212 | ERK1                              | 96 | 1000 |
| ITRI-E-212 | AURKC                             | 96 | 1000 |
| ITRI-E-212 | CSNK1A1L                          | 96 | 1000 |
| ITRI-E-212 | MAP3K4                            | 96 | 1000 |
| ITRI-E-212 | NEK9                              | 96 | 1000 |
| ITRI-E-212 | EPHB2                             | 96 | 1000 |
| ITRI-E-212 | FGR                               | 96 | 1000 |
| ITRI-E-212 | FLT3                              | 96 | 1000 |
| ITRI-E-212 | GSK3A                             | 96 | 1000 |
| ITRI-E-212 | MAP4K5                            | 96 | 1000 |
| ITRI-E-212 | TEC                               | 96 | 1000 |
| ITRI-E-212 | TNK1                              | 97 | 1000 |
| ITRI-E-212 | DCAMKL1                           | 97 | 1000 |
| ITRI-E-212 | MRCKB                             | 97 | 1000 |
| ITRI-E-212 | ASK2                              | 97 | 1000 |

|            |                            |    |      |
|------------|----------------------------|----|------|
| ITRI-E-212 | FLT3-autoinhibited         | 97 | 1000 |
| ITRI-E-212 | ABL1-<br>nonphosphorylated | 97 | 1000 |
| ITRI-E-212 | ASK1                       | 97 | 1000 |
| ITRI-E-212 | ABL1-phosphorylated        | 97 | 1000 |
| ITRI-E-212 | EGFR(G719C)                | 97 | 1000 |
| ITRI-E-212 | ERK8                       | 97 | 1000 |
| ITRI-E-212 | CSNK1D                     | 97 | 1000 |
| ITRI-E-212 | NLK                        | 97 | 1000 |
| ITRI-E-212 | FER                        | 97 | 1000 |
| ITRI-E-212 | SIK2                       | 97 | 1000 |
| ITRI-E-212 | IGF1R                      | 97 | 1000 |
| ITRI-E-212 | ITK                        | 97 | 1000 |
| ITRI-E-212 | ERK2                       | 97 | 1000 |
| ITRI-E-212 | CDK8                       | 97 | 1000 |
| ITRI-E-212 | PFTAIRE2                   | 97 | 1000 |
| ITRI-E-212 | HCK                        | 97 | 1000 |
| ITRI-E-212 | CSNK1E                     | 97 | 1000 |
| ITRI-E-212 | PYK2                       | 97 | 1000 |
| ITRI-E-212 | ACVRL1                     | 97 | 1000 |
| ITRI-E-212 | MUSK                       | 97 | 1000 |
| ITRI-E-212 | YSK1                       | 97 | 1000 |
| ITRI-E-212 | TRPM6                      | 98 | 1000 |
| ITRI-E-212 | BIKE                       | 98 | 1000 |
| ITRI-E-212 | MET(M1250T)                | 98 | 1000 |
| ITRI-E-212 | ARK5                       | 98 | 1000 |
| ITRI-E-212 | ACVR1B                     | 98 | 1000 |
| ITRI-E-212 | EPHA5                      | 98 | 1000 |
| ITRI-E-212 | ERK3                       | 98 | 1000 |
| ITRI-E-212 | LOK                        | 98 | 1000 |
| ITRI-E-212 | NEK6                       | 98 | 1000 |
| ITRI-E-212 | WEE2                       | 98 | 1000 |
| ITRI-E-212 | TIE2                       | 98 | 1000 |
| ITRI-E-212 | ERK4                       | 98 | 1000 |
| ITRI-E-212 | MARK3                      | 98 | 1000 |
| ITRI-E-212 | TNK2                       | 98 | 1000 |
| ITRI-E-212 | DMPK                       | 99 | 1000 |
| ITRI-E-212 | EPHA7                      | 99 | 1000 |

|            |                               |     |      |
|------------|-------------------------------|-----|------|
| ITRI-E-212 | RPS6KA4(Kin.Dom.1-N-terminal) | 99  | 1000 |
| ITRI-E-212 | CDK4-cyclinD3                 | 99  | 1000 |
| ITRI-E-212 | CAMK1G                        | 99  | 1000 |
| ITRI-E-212 | EPHA8                         | 99  | 1000 |
| ITRI-E-212 | CAMK2B                        | 99  | 1000 |
| ITRI-E-212 | LTK                           | 99  | 1000 |
| ITRI-E-212 | DDR1                          | 99  | 1000 |
| ITRI-E-212 | CDK3                          | 99  | 1000 |
| ITRI-E-212 | ERBB4                         | 99  | 1000 |
| ITRI-E-212 | MST1R                         | 99  | 1000 |
| ITRI-E-212 | CDKL5                         | 100 | 1000 |
| ITRI-E-212 | ABL1(Q252H)-nonphosphorylated | 100 | 1000 |
| ITRI-E-212 | LRRK2(G2019S)                 | 100 | 1000 |
| ITRI-E-212 | PIP5K2B                       | 100 | 1000 |
| ITRI-E-212 | OSR1                          | 100 | 1000 |
| ITRI-E-212 | PIP5K2C                       | 100 | 1000 |
| ITRI-E-212 | MST4                          | 100 | 1000 |
| ITRI-E-212 | QSK                           | 100 | 1000 |
| ITRI-E-212 | DYRK1B                        | 100 | 1000 |
| ITRI-E-212 | EGFR(S752-I759del)            | 100 | 1000 |
| ITRI-E-212 | PIP5K1A                       | 100 | 1000 |
| ITRI-E-212 | SNRK                          | 100 | 1000 |
| ITRI-E-212 | CSNK1G3                       | 100 | 1000 |
| ITRI-E-212 | MARK2                         | 100 | 1000 |
| ITRI-E-212 | MET                           | 100 | 1000 |
| ITRI-E-212 | CDC2L5                        | 100 | 1000 |
| ITRI-E-212 | STK35                         | 100 | 1000 |
| ITRI-E-212 | TAOK1                         | 100 | 1000 |
| ITRI-E-212 | FYN                           | 100 | 1000 |
| ITRI-E-212 | CAMKK1                        | 100 | 1000 |
| ITRI-E-212 | CSF1R                         | 100 | 1000 |
| ITRI-E-212 | BLK                           | 100 | 1000 |
| ITRI-E-212 | EPHA4                         | 100 | 1000 |
| ITRI-E-212 | PIP5K1C                       | 100 | 1000 |
| ITRI-E-212 | PRP4                          | 100 | 1000 |
| ITRI-E-212 | KIT(L576P)                    | 100 | 1000 |

|            |                  |     |      |
|------------|------------------|-----|------|
| ITRI-E-212 | KIT(V559D)       | 100 | 1000 |
| ITRI-E-212 | KIT(V559D,V654A) | 100 | 1000 |
| ITRI-E-212 | MRCKA            | 100 | 1000 |
| ITRI-E-212 | SRPK2            | 100 | 1000 |
| ITRI-E-212 | FLT1             | 100 | 1000 |
| ITRI-E-212 | HPK1             | 100 | 1000 |
| ITRI-E-212 | MAP4K3           | 100 | 1000 |
| ITRI-E-212 | FRK              | 100 | 1000 |
| ITRI-E-212 | MST1             | 100 | 1000 |
| ITRI-E-212 | MTOR             | 100 | 1000 |
| ITRI-E-212 | DCAMKL2          | 100 | 1000 |
| ITRI-E-212 | SRMS             | 100 | 1000 |
| ITRI-E-212 | CASK             | 100 | 1000 |
| ITRI-E-212 | CDKL2            | 100 | 1000 |
| ITRI-E-212 | KIT              | 100 | 1000 |
| ITRI-E-212 | KIT(V559D,T670I) | 100 | 1000 |
| ITRI-E-212 | MAP4K2           | 100 | 1000 |
| ITRI-E-212 | TIE1             | 100 | 1000 |
| ITRI-E-212 | BRK              | 100 | 1000 |
| ITRI-E-212 | EPHB3            | 100 | 1000 |
| ITRI-E-212 | FAK              | 100 | 1000 |
| ITRI-E-212 | MYLK2            | 100 | 1000 |
| ITRI-E-212 | VEGFR2           | 100 | 1000 |
| ITRI-E-212 | CDK2             | 100 | 1000 |
| ITRI-E-212 | ERBB2            | 100 | 1000 |
| ITRI-E-212 | TAOK3            | 100 | 1000 |
| ITRI-E-212 | ADCK4            | 100 | 1000 |
| ITRI-E-212 | INSRR            | 100 | 1000 |
| ITRI-E-212 | CDKL1            | 100 | 1000 |
| ITRI-E-212 | MAPKAPK2         | 100 | 1000 |
| ITRI-E-212 | MLK2             | 100 | 1000 |
| ITRI-E-212 | PDGFRB           | 100 | 1000 |
| ITRI-E-212 | TNIK             | 100 | 1000 |
| ITRI-E-212 | ACVR2A           | 100 | 1000 |
| ITRI-E-212 | ACVR2B           | 100 | 1000 |
| ITRI-E-212 | BMPR1A           | 100 | 1000 |
| ITRI-E-212 | EPHA6            | 100 | 1000 |
| ITRI-E-212 | EPHB4            | 100 | 1000 |

|            |                            |     |      |
|------------|----------------------------|-----|------|
| ITRI-E-212 | FES                        | 100 | 1000 |
| ITRI-E-212 | GCN2(Kin.Dom.2,S808G)      | 100 | 1000 |
| ITRI-E-212 | p38-delta                  | 100 | 1000 |
| ITRI-E-212 | PCK3                       | 100 | 1000 |
| ITRI-E-212 | RSK1(Kin.Dom.2-C-terminal) | 100 | 1000 |
| ITRI-E-212 | TGFBR2                     | 100 | 1000 |
| ITRI-E-212 | WEE1                       | 100 | 1000 |
| ITRI-E-212 | WNK1                       | 100 | 1000 |
| ITRI-E-212 | WNK3                       | 100 | 1000 |
| ITRI-E-212 | YANK3                      | 100 | 1000 |
